# Supplementary material for: Influence of heterogeneous layers of graphene oxide on bottom-connected organic field effect transistors
Source: Royal Society of Chemistry journal article supplement (doi:10.1039/d5nj00150a), 2025-01-01
Supplement: d5nj00150a1.pdf [file d5nj00150a1.pdf]

## Support information

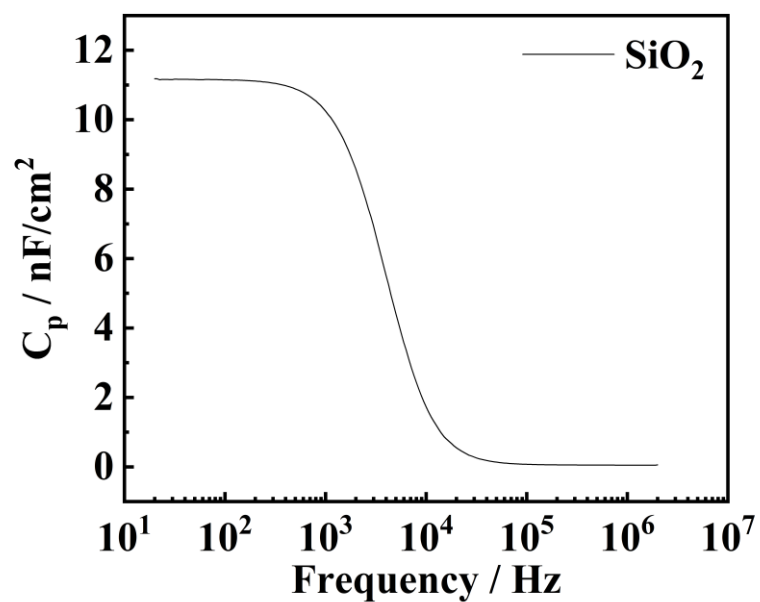

Fig. S1 Capacitance-frequency image of SiO<sub>2</sub>

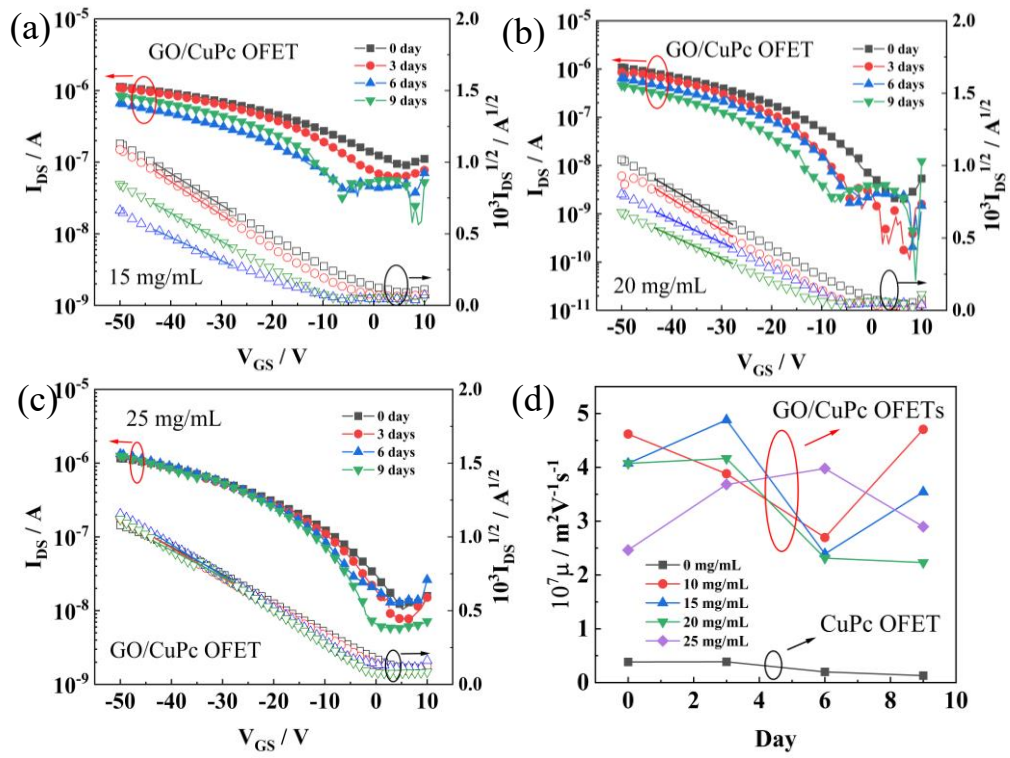

Fig. S2 Stability images. Fig. (a)-(c) show the stability of CuPc OFETs modified with 15, 20 and 25 mg/ml GO solution; Fig. (d) is the mobility of different concentrations of GO/CuPc OFETs.

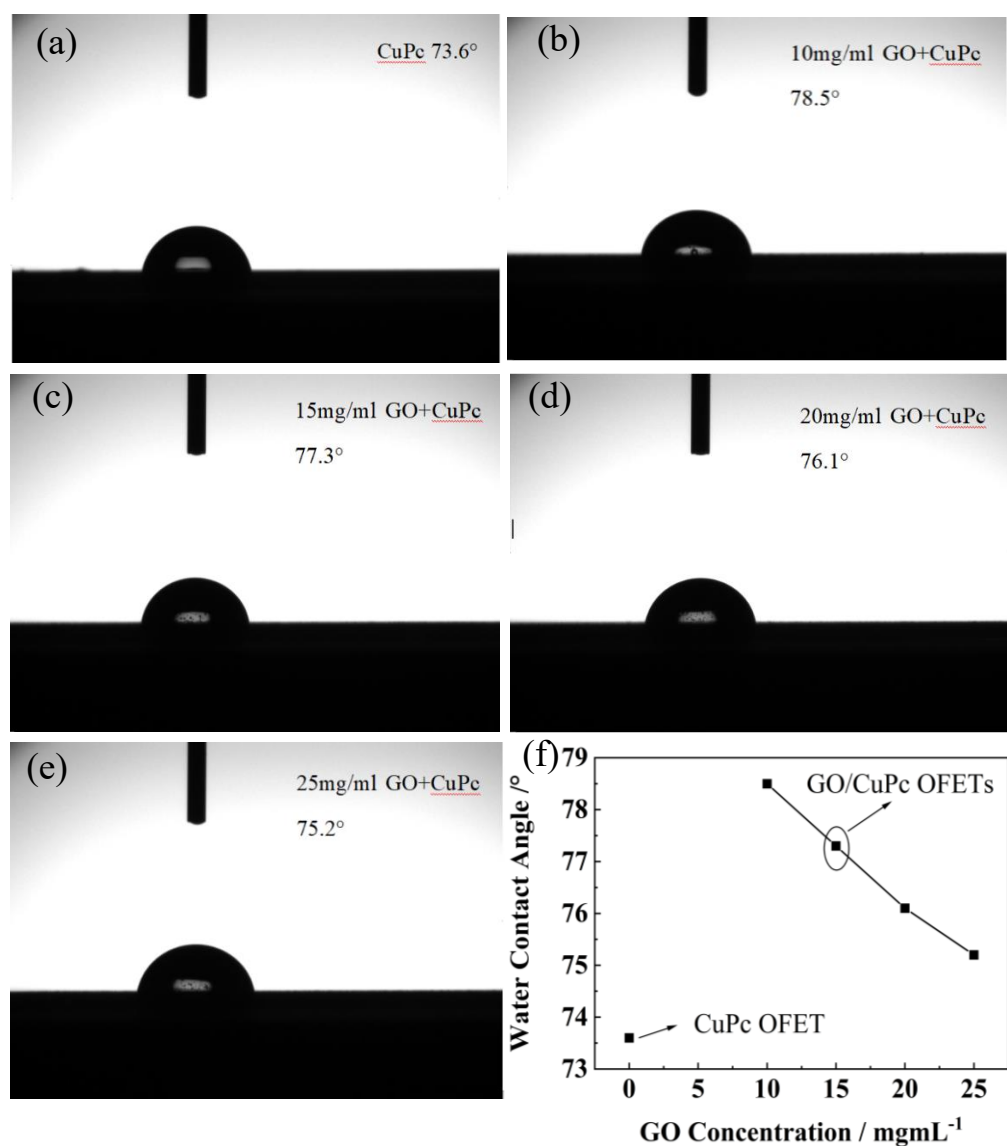

Fig. S3 Water contact angle images. Fig. (a)-(e) show the water contact angles of CuPc films modified with 0, 10, 15, 20 and 25 mg/ml of GO solutions, respectively, and Fig. (f) shows the linear variation of the above angles.

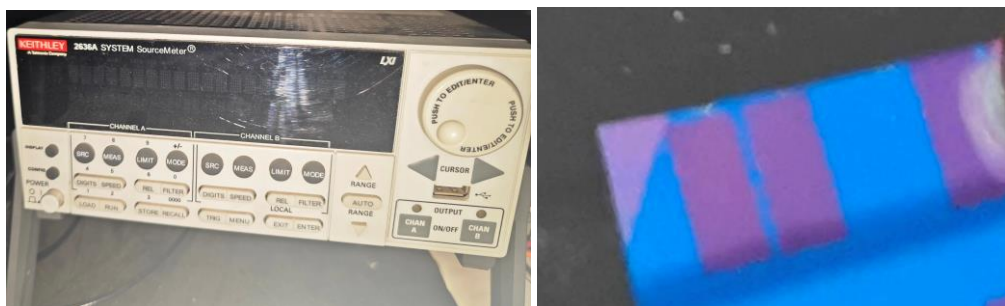

Fig. S4 Equipment and sample photos. (a) Crystal oscillator (b) Real CuPc transistor photos

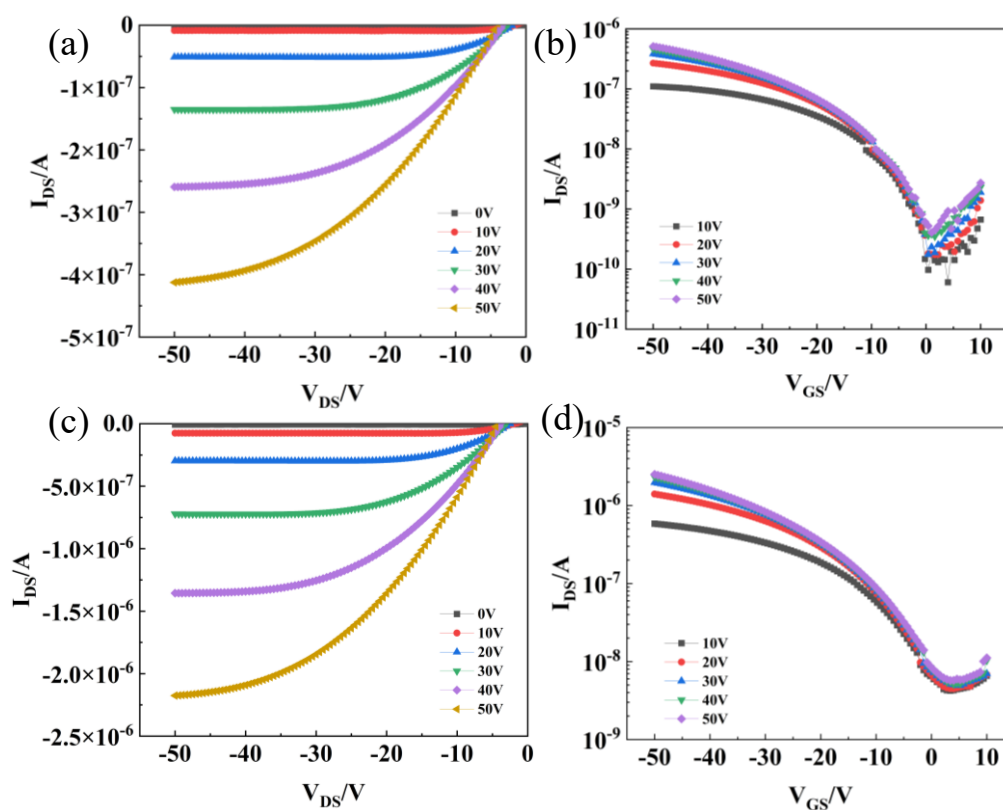

Fig. S5 The electrical properties of different batches of thin films. (a) and (b) show the output and transfer performance images of copper phthalocyanine films, respectively. Figures (c) and (d) show the output and transfer images of GO/CuPc films, respectively.

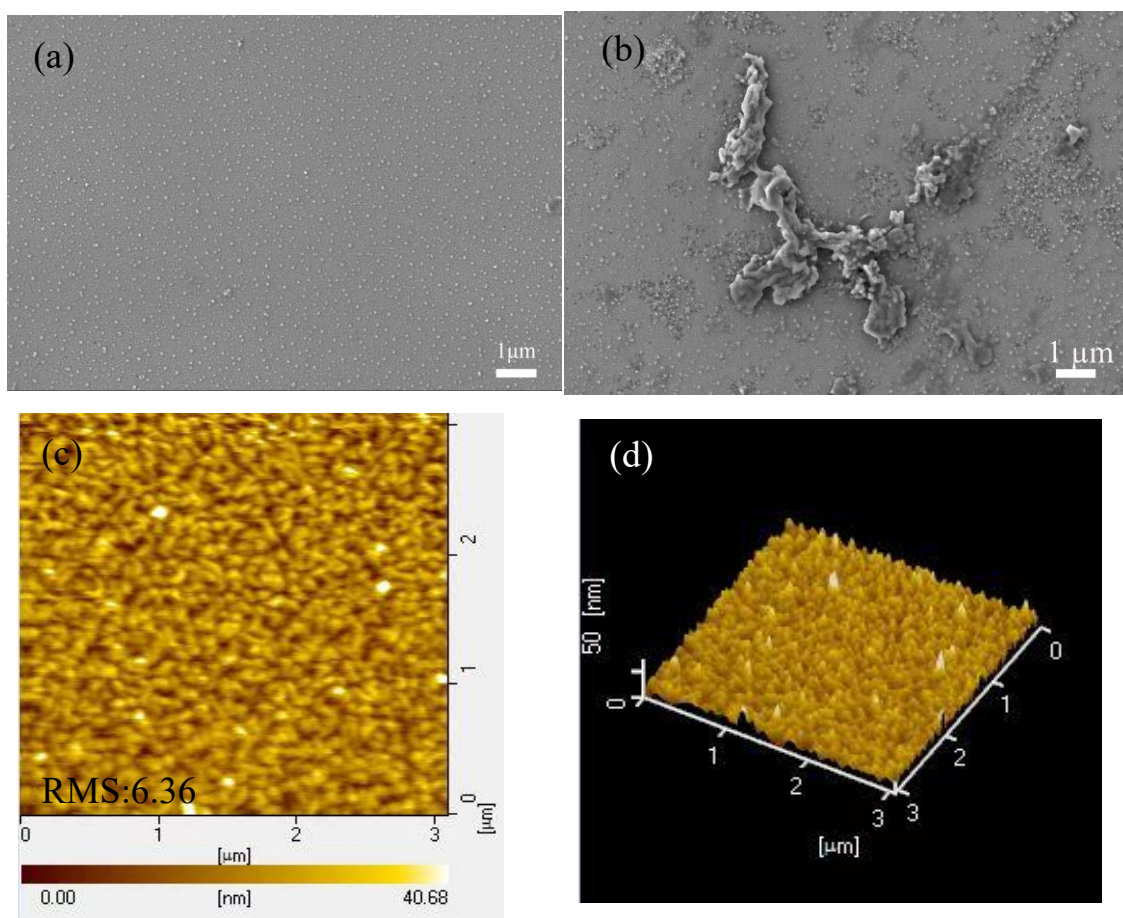

Fig. S6: Characterization images of (a) SEM morphology of CuPc films; (b) SEM morphology of GO/CuPc films; AFM morphology and three-dimensional AFM morphology of (c) and (d) CuPc films.
